# Supplementary material for: Global Proteomics for Identifying the Alteration Pathway of Niemann–Pick Disease Type C Using Hepatic Cell Models
Source: MDPI journal article supplement (doi:10.3390/ijms242115642), 2023-10-27
Supplement: s1 [file s1]

Table S3 Differentially expression proteins in label free global proteomics

(a) Up-regulated proteins comparison KO1 versus WT

| Accession | Description                                                 | Gene Symbol | Fold change | P-value  |
|-----------|-------------------------------------------------------------|-------------|-------------|----------|
| P02458    | Collagen alpha-1(II) chain                                  | COL2A1      | 24.03       | 4.00E-06 |
| Q13772    | Nuclear receptor coactivator 4                              | NCOA4       | 8.75        | 3.15E-05 |
| P08670    | Vimentin                                                    | VIM         | 4.94        | 2.46E-11 |
| Q3LXA3    | Triokinase/FMN cyclase                                      | TKFC        | 4.90        | 1.40E-04 |
| O95994    | Anterior gradient protein 2 homolog                         | AGR2        | 4.86        | 2.00E-08 |
| Q13137    | Calcium-binding and coiled-coil domain-containing protein 2 | CALCOCO2    | 4.57        | 3.68E-06 |
| P60520    | Gamma-aminobutyric acid receptor-associated protein-like 2  | GABARAPL2   | 4.32        | 2.14E-04 |
| Q9H223    | EH domain-containing protein 4                              | EHD4        | 4.27        | 8.61E-06 |
| P08727    | Keratin, type I cytoskeletal 19                             | KRT19       | 4.19        | 3.08E-10 |
| P48681    | Nestin                                                      | NES         | 4.07        | 1.97E-10 |
| O00515    | Ladinin-1                                                   | LAD1        | 3.41        | 5.92E-03 |
| Q15293    | Reticulocalbin-1                                            | RCN1        | 3.36        | 3.17E-05 |
| Q96QD8    | Sodium-coupled neutral amino acid transporter 2             | SLC38A2     | 3.17        | 1.35E-05 |
| P02766    | Transthyretin                                               | TTR         | 3.13        | 1.68E-05 |
| P11586    | C-1-tetrahydrofolate synthase, cytoplasmic                  | MTHFD1      | 2.97        | 1.63E-06 |
| P02794    | Ferritin heavy chain                                        | FTH1        | 2.96        | 8.39E-04 |
| P30990    | Neurotensin/neuromedin N                                    | NTS         | 2.87        | 5.80E-08 |
| P08962    | CD63 antigen                                                | CD63        | 2.84        | 6.54E-09 |
| P27169    | Serum paraoxonase/arylesterase 1                            | PON1        | 2.77        | 1.44E-04 |
| P0C0L4    | Complement C4-A                                             | C4A         | 2.71        | 1.11E-03 |

| Accession | Description                                                     | Gene Symbol | Fold change | P-value  |
|-----------|-----------------------------------------------------------------|-------------|-------------|----------|
| Q15424    | Scaffold attachment factor B1                                   | SAFB        | 2.68        | 1.43E-06 |
| Q9HCL2    | Glycerol-3-phosphate acyltransferase 1, mitochondrial           | GPAM        | 2.59        | 7.90E-03 |
| Q9Y287    | Integral membrane protein 2B                                    | ITM2B       | 2.58        | 2.83E-03 |
| P08243    | Asparagine synthetase [glutamine-hydrolyzing]                   | ASNS        | 2.56        | 1.66E-04 |
| P37268    | Squalene synthase                                               | FDFT1       | 2.55        | 5.58E-10 |
| P30825    | High affinity cationic amino acid transporter 1                 | SLC7A1      | 2.46        | 8.18E-09 |
| Q9GZQ8    | Microtubule-associated proteins 1A/1B light chain 3B            | MAP1LC3B    | 2.39        | 1.40E-06 |
| P02792    | Ferritin light chain                                            | FTL         | 2.37        | 3.72E-05 |
| Q9Y4J8    | Dystrobrevin alpha                                              | DTNA        | 2.36        | 5.28E-05 |
| P53801    | Pituitary tumor-transforming gene 1 protein-interacting protein | PTTG1IP     | 2.34        | 4.24E-05 |
| P48449    | Lanosterol synthase                                             | LSS         | 2.33        | 1.78E-09 |
| Q9UKR5    | Ergosterol biosynthetic protein 28 homolog                      | ERG28       | 2.30        | 1.24E-02 |
| Q9UBM7    | 7-dehydrocholesterol reductase                                  | DHCR7       | 2.28        | 3.84E-07 |
| Q9C075    | Keratin, type I cytoskeletal 23                                 | KRT23       | 2.26        | 1.75E-06 |
| Q9NRX5    | Serine incorporator 1                                           | SERINC1     | 2.17        | 7.86E-05 |
| Q9H8H3    | Putative methyltransferase-like protein 7A                      | METTL7A     | 2.14        | 1.08E-04 |
| Q9Y624    | Junctional adhesion molecule A                                  | F11R        | 2.13        | 8.61E-07 |
| P36955    | Pigment epithelium-derived factor                               | SERPINF1    | 2.11        | 4.40E-04 |
| P61916    | NPC intracellular cholesterol transporter 2                     | NPC2        | 2.09        | 1.80E-08 |
| P49585    | Choline-phosphate cytidylyltransferase A                        | PCYT1A      | 2.07        | 4.46E-05 |
| Q9BXS4    | Transmembrane protein 59                                        | TMEM59      | 2.06        | 4.19E-05 |
| Q13501    | Sequestosome-1                                                  | SQSTM1      | 2.05        | 1.76E-05 |

| Accession | Description                                                          | Gene Symbol | Fold change | P-value  |
|-----------|----------------------------------------------------------------------|-------------|-------------|----------|
| Q01581    | Hydroxymethylglutaryl-CoA synthase, cytoplasmic                      | HMGCS1      | 2.05        | 3.99E-06 |
| P98160    | Basement membrane-specific heparan sulfate proteoglycan core protein | HSPG2       | 2.03        | 1.05E-05 |
| P29317    | Ephrin type-A receptor 2                                             | EPHA2       | 2.02        | 4.03E-07 |

(b) Down-regulated proteins comparison KO1 versus WT

| Accession | Description                                                      | Gene Symbol | Fold change | P-value  |
|-----------|------------------------------------------------------------------|-------------|-------------|----------|
| O00273    | DNA fragmentation factor subunit alpha                           | DFFA        | 0.050       | 3.24E-02 |
| Q96T88    | E3 ubiquitin-protein ligase UHRF1                                | UHRF1       | 0.102       | 2.71E-03 |
| Q14699    | Raftlin                                                          | RFTN1       | 0.145       | 2.50E-05 |
| P23141    | Liver carboxylesterase 1                                         | CES1        | 0.158       | 7.00E-08 |
| O00746    | Nucleoside diphosphate kinase, mitochondrial                     | NME4        | 0.209       | 1.24E-04 |
| Q14914    | Prostaglandin reductase 1                                        | PTGR1       | 0.210       | 9.37E-05 |
| P50416    | Carnitine O-palmitoyltransferase 1, liver isoform                | CPT1A       | 0.226       | 9.75E-09 |
| Q8TEX9    | Importin-4                                                       | IPO4        | 0.226       | 4.69E-04 |
| Q9GZZ9    | Ubiquitin-like modifier-activating enzyme 5                      | UBA5        | 0.229       | 4.84E-03 |
| P04062    | Lysosomal acid glucosylceramidase                                | GBA         | 0.246       | 5.68E-08 |
| Q9NUL5    | Shiftless antiviral inhibitor of ribosomal frameshifting protein | SHFL        | 0.250       | 3.64E-04 |
| Q99956    | Dual specificity protein phosphatase 9                           | DUSP9       | 0.281       | 4.84E-04 |
| O43396    | Thioredoxin-like protein 1                                       | TXNL1       | 0.298       | 3.02E-03 |
| Q9UL46    | Proteasome activator complex subunit 2                           | PSME2       | 0.313       | 1.88E-02 |
| Q9BSF4    | Mitochondrial import inner membrane translocase subunit Tim29    | TIMM29      | 0.316       | 7.45E-03 |
| Q5T2W1    | Na(+)/H(+) exchange regulatory cofactor NHE-RF3                  | PDZK1       | 0.321       | 6.97E-03 |

| Accession | Description                                           | Gene Symbol | Fold change | P-value  |
|-----------|-------------------------------------------------------|-------------|-------------|----------|
| P51788    | Chloride channel protein 2                            | CLCN2       | 0.324       | 1.37E-03 |
| Q9Y2Z2    | Protein MTO1 homolog, mitochondrial                   | MTO1        | 0.326       | 8.63E-03 |
| Q00059    | Transcription factor A, mitochondrial                 | TFAM        | 0.326       | 1.12E-02 |
| Q9BZK7    | F-box-like/WD repeat-containing protein TBL1XR1       | TBL1XR1     | 0.330       | 4.76E-04 |
| P09958    | Furin                                                 | FURIN       | 0.332       | 3.88E-03 |
| O15091    | Mitochondrial ribonuclease P catalytic subunit        | PRORP       | 0.334       | 9.28E-05 |
| Q13098    | COP9 signalosome complex subunit 1                    | GPS1        | 0.334       | 6.56E-04 |
| P49711    | Transcriptional repressor CTCF                        | CTCF        | 0.335       | 4.02E-02 |
| Q8IWX8    | Calcium homeostasis endoplasmic reticulum protein     | CHERP       | 0.348       | 2.37E-03 |
| Q8IWA4    | Mitofusin-1                                           | MFN1        | 0.358       | 3.48E-04 |
| Q8NBJ4    | Golgi membrane protein 1                              | GOLM1       | 0.361       | 3.76E-07 |
| Q8WXH0    | Nesprin-2                                             | SYNE2       | 0.363       | 4.87E-04 |
| P18615    | Negative elongation factor E                          | NELFE       | 0.370       | 1.88E-03 |
| Q8IUF8    | Ribosomal oxygenase 2                                 | RIOX2       | 0.372       | 4.76E-03 |
| P22830    | Ferrochelatase, mitochondrial                         | FECH        | 0.374       | 2.50E-06 |
| P00480    | Ornithine transcarbamylase, mitochondrial             | OTC         | 0.376       | 1.17E-05 |
| O95793    | Double-stranded RNA-binding protein Staufin homolog 1 | STAU1       | 0.377       | 7.21E-03 |
| Q7Z2W4    | Zinc finger CCCH-type antiviral protein 1             | ZC3HAV1     | 0.390       | 1.42E-03 |
| Q5T310    | G patch domain-containing protein 4                   | GPATCH4     | 0.394       | 9.24E-03 |
| O00754    | Lysosomal alpha-mannosidase                           | MAN2B1      | 0.396       | 4.24E-08 |
| O00461    | Golgi integral membrane protein 4                     | GOLIM4      | 0.396       | 2.70E-05 |
| Q9NX58    | Cell growth-regulating nucleolar protein              | LYAR        | 0.398       | 4.58E-02 |

| Accession | Description                                         | Gene Symbol | Fold change | P-value  |
|-----------|-----------------------------------------------------|-------------|-------------|----------|
| Q8NEN9    | PDZ domain-containing protein 8                     | PDZD8       | 0.399       | 5.08E-03 |
| Q9NP58    | ATP-binding cassette sub-family B member 6          | ABCB6       | 0.400       | 1.16E-03 |
| Q6DN90    | IQ motif and SEC7 domain-containing protein 1       | IQSEC1      | 0.400       | 1.97E-04 |
| Q9H4I3    | TraB domain-containing protein                      | TRABD       | 0.402       | 5.42E-05 |
| Q8N128    | Protein FAM177A1                                    | FAM177A1    | 0.403       | 1.53E-03 |
| Q6L8Q7    | 2',5'-phosphodiesterase 12                          | PDE12       | 0.412       | 2.27E-02 |
| Q8WYP5    | Protein ELYS                                        | AHCTF1      | 0.415       | 3.42E-05 |
| Q9GZR7    | ATP-dependent RNA helicase DDX24                    | DDX24       | 0.416       | 1.68E-02 |
| Q9Y277    | Voltage-dependent anion-selective channel protein 3 | VDAC3       | 0.417       | 4.39E-03 |
| P46013-2  | Isoform Short of Proliferation marker protein Ki-67 | MKI67       | 0.419       | 1.50E-05 |
| Q8NBT2    | Kinetochore protein Spc24                           | SPC24       | 0.422       | 3.13E-05 |
| P21796    | Voltage-dependent anion-selective channel protein 1 | VDAC1       | 0.426       | 1.80E-04 |
| Q15070    | Mitochondrial inner membrane protein OXA1L          | OXA1L       | 0.426       | 1.61E-02 |
| O96008    | Mitochondrial import receptor subunit TOM40 homolog | TOMM40      | 0.431       | 1.63E-02 |
| P17050    | Alpha-N-acetylgalactosaminidase                     | NAGA        | 0.433       | 5.36E-05 |
| Q9NZI8    | Insulin-like growth factor 2 mRNA-binding protein 1 | IGF2BP1     | 0.433       | 4.00E-02 |
| O15321    | Transmembrane 9 superfamily member 1                | TM9SF1      | 0.435       | 3.23E-04 |
| P17931    | Galectin-3                                          | LGALS3      | 0.438       | 1.66E-04 |
| Q14353    | Guanidinoacetate N-methyltransferase                | GAMT        | 0.439       | 4.17E-02 |
| Q15291    | Retinoblastoma-binding protein 5                    | RBBP5       | 0.446       | 6.01E-03 |
| P07306    | Asialoglycoprotein receptor 1                       | ASGR1       | 0.446       | 1.89E-05 |
| P15291    | Beta-1,4-galactosyltransferase 1                    | B4GALT1     | 0.449       | 8.33E-05 |

| Accession | Description                                                                       | Gene Symbol | Fold change | P-value  |
|-----------|-----------------------------------------------------------------------------------|-------------|-------------|----------|
| A6NH11    | Glycolipid transfer protein domain-containing protein 2                           | GLTPD2      | 0.449       | 1.68E-05 |
| Q6IQ49    | Replication stress response regulator SDE2                                        | SDE2        | 0.449       | 3.74E-02 |
| P04424    | Argininosuccinate lyase                                                           | ASL         | 0.449       | 1.04E-02 |
| P36873    | Serine/threonine-protein phosphatase PP1-gamma catalytic subunit                  | PPP1CC      | 0.450       | 7.26E-04 |
| Q9BQE5    | Apolipoprotein L2                                                                 | APOL2       | 0.450       | 5.30E-05 |
| Q10469    | Alpha-1,6-mannosyl-glycoprotein 2-beta-N-acetylglucosaminyltransferase            | MGAT2       | 0.450       | 2.84E-05 |
| Q2TAL8    | Transcriptional regulator QRICH1                                                  | QRICH1      | 0.453       | 5.57E-03 |
| Q08378    | Golgin subfamily A member 3                                                       | GOLGA3      | 0.456       | 2.07E-03 |
| Q9NQ29    | Putative RNA-binding protein Luc7-like 1                                          | LUC7L       | 0.457       | 2.10E-03 |
| Q9BRZ2    | E3 ubiquitin-protein ligase TRIM56                                                | TRIM56      | 0.459       | 3.02E-03 |
| Q99661    | Kinesin-like protein KIF2C                                                        | KIF2C       | 0.460       | 1.68E-03 |
| O60573    | Eukaryotic translation initiation factor 4E type 2                                | EIF4E2      | 0.460       | 2.45E-02 |
| P00568    | Adenylate kinase isoenzyme 1                                                      | AK1         | 0.460       | 2.52E-02 |
| P00918    | Carbonic anhydrase 2                                                              | CA2         | 0.461       | 9.01E-03 |
| P55789    | FAD-linked sulfhydryl oxidase ALR                                                 | GFER        | 0.462       | 1.13E-03 |
| Q92896    | Golgi apparatus protein 1                                                         | GLG1        | 0.466       | 1.17E-06 |
| Q5JTH9    | RRP12-like protein                                                                | RRP12       | 0.471       | 3.76E-02 |
| Q99575    | Ribonucleases P/MRP protein subunit POP1                                          | POP1        | 0.472       | 3.03E-02 |
| P63151    | Serine/threonine-protein phosphatase 2A 55 kDa regulatory subunit B alpha isoform | PPP2R2A     | 0.473       | 1.51E-03 |
| Q9NYM9    | BET1-like protein                                                                 | BET1L       | 0.475       | 3.97E-03 |
| Q5VUD6    | Divergent protein kinase domain 1B                                                | DIPK1B      | 0.479       | 1.53E-02 |
| O15020    | Spectrin beta chain, non-erythrocytic 2                                           | SPTBN2      | 0.481       | 3.90E-03 |

| Accession | Description                                        | Gene Symbol | Fold change | P-value  |
|-----------|----------------------------------------------------|-------------|-------------|----------|
| O00411    | DNA-directed RNA polymerase, mitochondrial         | POLRMT      | 0.490       | 4.09E-04 |
| Q9H0A0    | RNA cytidine acetyltransferase                     | NAT10       | 0.492       | 2.31E-03 |
| P00492    | Hypoxanthine-guanine phosphoribosyltransferase     | HPRT1       | 0.495       | 7.05E-03 |
| Q86UK7    | E3 ubiquitin-protein ligase ZNF598                 | ZNF598      | 0.496       | 4.60E-03 |
| Q9NPG3    | Ubinuclein-1                                       | UBN1        | 0.496       | 4.17E-04 |
| Q99543    | DnaJ homolog subfamily C member 2                  | DNAJC2      | 0.497       | 3.92E-02 |
| Q8N6C5    | Immunoglobulin superfamily member 1                | IGSF1       | 0.497       | 1.35E-04 |
| P23921    | Ribonucleoside-diphosphate reductase large subunit | RRM1        | 0.498       | 1.63E-02 |
| Q6IBS0    | Twinfilin-2                                        | TWF2        | 0.498       | 1.69E-02 |

(c) Up-regulated proteins comparison KO2 versus WT

| Accession | Description                                                 | Gene Symbol | Fold change | P-value  |
|-----------|-------------------------------------------------------------|-------------|-------------|----------|
| P02458    | Collagen alpha-1(II) chain                                  | COL2A1      | 37.8        | 8.14E-07 |
| Q13772    | Nuclear receptor coactivator 4                              | NCOA4       | 16.2        | 2.91E-08 |
| Q13137    | Calcium-binding and coiled-coil domain-containing protein 2 | CALCOCO2    | 7.99        | 1.82E-08 |
| P09234    | U1 small nuclear ribonucleoprotein C                        | SNRPC       | 5.88        | 1.73E-02 |
| Q13501    | Sequestosome-1                                              | SQSTM1      | 5.83        | 1.50E-08 |
| P02794    | Ferritin heavy chain                                        | FTH1        | 5.82        | 3.71E-07 |
| Q9H223    | EH domain-containing protein 4                              | EHD4        | 5.48        | 3.99E-05 |
| P43003    | Excitatory amino acid transporter 1                         | SLC1A3      | 5.31        | 2.58E-06 |
| P02792    | Ferritin light chain                                        | FTL         | 5.19        | 7.22E-09 |
| P60520    | Gamma-aminobutyric acid receptor-associated protein-like 2  | GABARAPL2   | 4.96        | 7.04E-03 |

| Accession | Description                                                | Gene Symbol | Fold change | P-value  |
|-----------|------------------------------------------------------------|-------------|-------------|----------|
| O00515    | Ladinin-1                                                  | LAD1        | 4.69        | 2.65E-04 |
| Q06033    | Inter-alpha-trypsin inhibitor heavy chain H3               | ITIH3       | 4.59        | 5.14E-07 |
| Q06330    | Recombining binding protein suppressor of hairless         | RBPJ        | 4.01        | 2.87E-07 |
| Q15942    | Zyxin                                                      | ZYX         | 3.88        | 4.82E-04 |
| P0C0L4    | Complement C4-A                                            | C4A         | 3.87        | 6.43E-04 |
| Q7KZ85    | Transcription elongation factor SPT6                       | SUPT6H      | 3.77        | 2.03E-05 |
| Q9BVJ6    | U3 small nucleolar RNA-associated protein 14 homolog A     | UTP14A      | 3.73        | 2.67E-04 |
| P09327    | Villin-1                                                   | VIL1        | 3.67        | 3.28E-07 |
| P04920    | Anion exchange protein 2                                   | SLC4A2      | 3.52        | 3.38E-07 |
| Q9NUJ7    | PI-PLC X domain-containing protein 1                       | PLCXD1      | 3.50        | 1.39E-04 |
| Q658P3    | Metalloreductase STEAP3                                    | STEAP3      | 3.47        | 5.74E-05 |
| Q9BXS4    | Transmembrane protein 59                                   | TMEM59      | 3.46        | 4.14E-08 |
| Q9GZQ8    | Microtubule-associated proteins 1A/1B light chain 3B       | MAP1LC3B    | 3.44        | 1.26E-07 |
| Q9GZR7    | ATP-dependent RNA helicase DDX24                           | DDX24       | 3.41        | 1.00E-05 |
| Q9NV92    | NEDD4 family-interacting protein 2                         | NDFIP2      | 3.38        | 2.92E-06 |
| Q14258    | E3 ubiquitin/ISG15 ligase TRIM25                           | TRIM25      | 3.38        | 3.04E-04 |
| Q01105    | Protein SET                                                | SET         | 3.36        | 1.91E-06 |
| P46926    | Glucosamine-6-phosphate isomerase 1                        | GNPDA1      | 3.35        | 3.29E-06 |
| Q5QJE6    | Deoxynucleotidyltransferase terminal-interacting protein 2 | DNTTIP2     | 3.31        | 3.96E-05 |
| O15213    | WD repeat-containing protein 46                            | WDR46       | 3.30        | 3.40E-05 |
| Q01082-3  | Isoform 2 of Spectrin beta chain, non-erythrocytic 1       | SPTBN1      | 3.24        | 3.41E-06 |
| O00308    | NEDD4-like E3 ubiquitin-protein ligase WWP2                | WWP2        | 3.20        | 7.31E-03 |



| Accession | Description                                                                 | Gene Symbol | Fold change | P-value  |
|-----------|-----------------------------------------------------------------------------|-------------|-------------|----------|
| Q9UHR4    | Brain-specific angiogenesis inhibitor 1-associated protein 2-like protein 1 | BAIAP2L1    | 3.17        | 1.01E-03 |
| Q68CR1    | Protein sel-1 homolog 3                                                     | SEL1L3      | 3.17        | 1.21E-04 |
| P08962    | CD63 antigen                                                                | CD63        | 3.14        | 4.80E-09 |
| P98179    | RNA-binding protein 3                                                       | RBM3        | 3.12        | 3.91E-03 |
| P29317    | Ephrin type-A receptor 2                                                    | EPHA2       | 3.10        | 1.10E-08 |
| P08243    | Asparagine synthetase [glutamine-hydrolyzing]                               | ASNS        | 3.06        | 4.60E-04 |
| Q6I9Y2    | THO complex subunit 7 homolog                                               | THOC7       | 3.03        | 1.56E-03 |
| P22748    | Carbonic anhydrase 4                                                        | CA4         | 3.03        | 3.99E-07 |
| Q15813    | Tubulin-specific chaperone E                                                | TBCE        | 3.03        | 4.64E-02 |
| P31350    | Ribonucleoside-diphosphate reductase subunit M2                             | RRM2        | 2.99        | 1.35E-04 |
| P04035    | 3-hydroxy-3-methylglutaryl-coenzyme A reductase                             | HMGCR       | 2.90        | 1.81E-07 |
| P11532    | Dystrophin                                                                  | DMD         | 2.89        | 1.68E-07 |
| Q13895    | Bystin                                                                      | BYSL        | 2.82        | 4.61E-03 |
| Q9Y287    | Integral membrane protein 2B                                                | ITM2B       | 2.82        | 2.83E-03 |
| O75821    | Eukaryotic translation initiation factor 3 subunit G                        | EIF3G       | 2.82        | 9.83E-08 |
| Q8NCA5    | Protein FAM98A                                                              | FAM98A      | 2.81        | 1.11E-02 |
| Q01581    | Hydroxymethylglutaryl-CoA synthase, cytoplasmic                             | HMGCS1      | 2.81        | 9.56E-07 |
| Q8WTT2    | Nucleolar complex protein 3 homolog                                         | NOC3L       | 2.79        | 3.84E-04 |
| O60231    | Pre-mRNA-splicing factor ATP-dependent RNA helicase DHX16                   | DHX16       | 2.75        | 4.46E-03 |
| Q14914    | Prostaglandin reductase 1                                                   | PTGR1       | 2.73        | 7.35E-05 |
| P11274    | Breakpoint cluster region protein                                           | BCR         | 2.72        | 8.58E-03 |
| Q96IZ0    | PRKC apoptosis WT1 regulator protein                                        | PAWR        | 2.70        | 4.37E-04 |

| Accession | Description                                                     | Gene Symbol | Fold change | P-value  |
|-----------|-----------------------------------------------------------------|-------------|-------------|----------|
| P56747    | Claudin-6                                                       | CLDN6       | 2.67        | 7.42E-05 |
| P53801    | Pituitary tumor-transforming gene 1 protein-interacting protein | PTTG1IP     | 2.66        | 1.13E-07 |
| Q99959    | Plakophilin-2                                                   | PKP2        | 2.65        | 1.02E-04 |
| P49770    | Translation initiation factor eIF-2B subunit beta               | EIF2B2      | 2.64        | 2.29E-03 |
| Q9H501    | ESF1 homolog                                                    | ESF1        | 2.55        | 5.71E-03 |
| Q9NRX5    | Serine incorporator 1                                           | SERINC1     | 2.53        | 6.01E-06 |
| Q9H6T3    | RNA polymerase II-associated protein 3                          | RPAP3       | 2.51        | 3.25E-03 |
| P67809    | Y-box-binding protein 1                                         | YBX1        | 2.50        | 1.63E-05 |
| P08670    | Vimentin                                                        | VIM         | 2.50        | 2.16E-09 |
| Q9NX24    | H/ACA ribonucleoprotein complex subunit 2                       | NHP2        | 2.49        | 1.43E-02 |
| P50995    | Annexin A11                                                     | ANXA11      | 2.49        | 1.39E-06 |
| Q96GQ7    | Probable ATP-dependent RNA helicase DDX27                       | DDX27       | 2.44        | 5.84E-05 |
| Q8IYB3    | Serine/arginine repetitive matrix protein 1                     | SRRM1       | 2.44        | 2.03E-04 |
| P04080    | Cystatin-B                                                      | CSTB        | 2.44        | 7.97E-03 |
| O43670    | BUB3-interacting and GLEBS motif-containing protein ZNF207      | ZNF207      | 2.43        | 2.19E-04 |
| Q9H307    | Pinin                                                           | PNN         | 2.43        | 6.12E-03 |
| O95816    | BAG family molecular chaperone regulator 2                      | BAG2        | 2.43        | 3.37E-06 |
| Q9NYH9    | U3 small nucleolar RNA-associated protein 6 homolog             | UTP6        | 2.42        | 1.84E-03 |
| Q9ULT8    | E3 ubiquitin-protein ligase HECTD1                              | HECTD1      | 2.42        | 1.03E-04 |
| Q9NWW5    | Ceroid-lipofuscinosis neuronal protein 6                        | CLN6        | 2.41        | 1.89E-04 |
| P48681    | Nestin                                                          | NES         | 2.39        | 7.37E-09 |
| Q15269    | Periodic tryptophan protein 2 homolog                           | PWP2        | 2.38        | 2.24E-02 |

| Accession | Description                                          | Gene Symbol | Fold change | P-value  |
|-----------|------------------------------------------------------|-------------|-------------|----------|
| O76094    | Signal recognition particle subunit SRP72            | SRP72       | 2.37        | 1.31E-04 |
| Q14254    | Flotillin-2                                          | FLOT2       | 2.37        | 2.18E-07 |
| Q15555    | Microtubule-associated protein RP/EB family member 2 | MAPRE2      | 2.34        | 1.47E-02 |
| P35251    | Replication factor C subunit 1                       | RFC1        | 2.34        | 4.85E-03 |
| O95232    | Luc7-like protein 3                                  | LUC7L3      | 2.34        | 3.18E-02 |
| Q9NY12    | H/ACA ribonucleoprotein complex subunit 1            | GAR1        | 2.31        | 1.54E-02 |
| P40222    | Alpha-taxilin                                        | TXLNA       | 2.31        | 5.40E-04 |
| Q99848    | Probable rRNA-processing protein EBP2                | EBNA1BP2    | 2.30        | 1.60E-03 |
| O95983    | Methyl-CpG-binding domain protein 3                  | MBD3        | 2.29        | 9.95E-03 |
| Q71RC2    | La-related protein 4                                 | LARP4       | 2.29        | 2.79E-06 |
| Q27J81    | Inverted formin-2                                    | INF2        | 2.29        | 6.28E-06 |
| Q5SYE7    | NHS-like protein 1                                   | NHSL1       | 2.28        | 4.45E-04 |
| P30825    | High affinity cationic amino acid transporter 1      | SLC7A1      | 2.27        | 7.26E-04 |
| Q03426    | Mevalonate kinase                                    | MVK         | 2.26        | 3.51E-04 |
| Q96QD8    | Sodium-coupled neutral amino acid transporter 2      | SLC38A2     | 2.25        | 9.02E-06 |
| Q9NRX1    | RNA-binding protein PNO1                             | PNO1        | 2.25        | 3.51E-03 |
| Q8NCG7    | Diacylglycerol lipase-beta                           | DAGLB       | 2.25        | 3.55E-03 |
| Q12788    | Transducin beta-like protein 3                       | TBL3        | 2.24        | 4.57E-03 |
| Q9NR56    | Muscleblind-like protein 1                           | MBNL1       | 2.23        | 1.21E-02 |
| P07384    | Calpain-1 catalytic subunit                          | CAPN1       | 2.22        | 4.99E-04 |
| Q8WXF1    | Paraspeckle component 1                              | PSPC1       | 2.22        | 5.28E-06 |
| Q04323    | UBX domain-containing protein 1                      | UBXN1       | 2.22        | 1.58E-03 |

| Accession | Description                                          | Gene Symbol | Fold change | P-value  |
|-----------|------------------------------------------------------|-------------|-------------|----------|
| Q9Y6G9    | Cytoplasmic dynein 1 light intermediate chain 1      | DYNC1LI1    | 2.21        | 4.08E-05 |
| Q9GZY8    | Mitochondrial fission factor                         | MFF         | 2.21        | 4.11E-04 |
| O60828    | Polyglutamine-binding protein 1                      | PQBP1       | 2.21        | 1.23E-02 |
| Q9NUQ6    | SPATS2-like protein                                  | SPATS2L     | 2.21        | 7.33E-04 |
| Q15286    | Ras-related protein Rab-35                           | RAB35       | 2.20        | 7.19E-03 |
| O60547    | GDP-mannose 4,6 dehydratase                          | GMDS        | 2.20        | 2.74E-04 |
| Q5T0D9    | Tumor protein p63-regulated gene 1-like protein      | TPRG1L      | 2.20        | 2.79E-04 |
| O00303    | Eukaryotic translation initiation factor 3 subunit F | EIF3F       | 2.20        | 8.40E-04 |
| P42166    | Lamina-associated polypeptide 2, isoform alpha       | TMPO        | 2.19        | 1.25E-03 |
| P46821    | Microtubule-associated protein 1B                    | MAP1B       | 2.19        | 1.44E-05 |
| P45973    | Chromobox protein homolog 5                          | CBX5        | 2.19        | 2.30E-04 |
| Q9BVP2    | Guanine nucleotide-binding protein-like 3            | GNL3        | 2.18        | 1.17E-02 |
| P52789    | Hexokinase-2                                         | HK2         | 2.18        | 1.36E-03 |
| P41567    | Eukaryotic translation initiation factor 1           | EIF1        | 2.18        | 1.19E-04 |
| Q7Z333    | Probable helicase senataxin                          | SETX        | 2.18        | 3.11E-04 |
| O00629    | Importin subunit alpha-3                             | KPNA4       | 2.18        | 7.50E-06 |
| Q96N67    | Dedicator of cytokinesis protein 7                   | DOCK7       | 2.17        | 4.59E-02 |
| Q9NY93    | Probable ATP-dependent RNA helicase DDX56            | DDX56       | 2.17        | 6.91E-03 |
| P20290    | Transcription factor BTF3                            | BTF3        | 2.17        | 2.28E-04 |
| Q5JTH9    | RRP12-like protein                                   | RRP12       | 2.16        | 7.54E-04 |
| P29279    | CCN family member 2                                  | CCN2        | 2.15        | 5.60E-05 |
| O75683    | Surfeit locus protein 6                              | SURF6       | 2.15        | 4.06E-02 |

| Accession | Description                                                             | Gene Symbol | Fold change | P-value  |
|-----------|-------------------------------------------------------------------------|-------------|-------------|----------|
| P23246    | Splicing factor, proline- and glutamine-rich                            | SFPQ        | 2.14        | 8.62E-06 |
| Q9H6R4    | Nucleolar protein 6                                                     | NOL6        | 2.14        | 5.26E-05 |
| O14880    | Microsomal glutathione S-transferase 3                                  | MGST3       | 2.13        | 1.07E-02 |
| Q9Y6M5    | Zinc transporter 1                                                      | SLC30A1     | 2.13        | 1.95E-05 |
| O60271    | C-Jun-amino-terminal kinase-interacting protein 4                       | SPAG9       | 2.12        | 3.20E-05 |
| O60701    | UDP-glucose 6-dehydrogenase                                             | UGDH        | 2.12        | 3.91E-05 |
| P12931    | Proto-oncogene tyrosine-protein kinase Src                              | SRC         | 2.12        | 4.18E-03 |
| P46379    | Large proline-rich protein BAG6                                         | BAG6        | 2.12        | 1.30E-04 |
| Q9Y2W2    | WW domain-binding protein 11                                            | WBP11       | 2.11        | 9.33E-06 |
| Q6P996    | Pyridoxal-dependent decarboxylase domain-containing protein 1           | PDXDC1      | 2.10        | 1.14E-02 |
| Q9NX58    | Cell growth-regulating nucleolar protein                                | LYAR        | 2.10        | 3.67E-03 |
| P69905    | Hemoglobin subunit alpha                                                | HBA1; HBA2  | 2.10        | 2.81E-06 |
| Q9Y262    | Eukaryotic translation initiation factor 3 subunit L                    | EIF3L       | 2.10        | 1.58E-05 |
| Q15424    | Scaffold attachment factor B1                                           | SAFB        | 2.09        | 3.26E-07 |
| Q14152    | Eukaryotic translation initiation factor 3 subunit A                    | EIF3A       | 2.09        | 5.42E-05 |
| P43007    | Neutral amino acid transporter A                                        | SLC1A4      | 2.09        | 9.59E-07 |
| Q9Y5J6    | Mitochondrial import inner membrane translocase subunit Tim10 B         | TIMM10B     | 2.09        | 4.72E-03 |
| Q96ST2    | Protein IWS1 homolog                                                    | IWS1        | 2.09        | 3.22E-04 |
| Q9P0V9    | Septin-10                                                               | SEPTIN10    | 2.08        | 1.33E-03 |
| Q9Y5K8    | V-type proton ATPase subunit D                                          | ATP6V1D     | 2.08        | 1.50E-03 |
| Q9H7M9    | V-type immunoglobulin domain-containing suppressor of T-cell activation | VSIR        | 2.08        | 1.57E-04 |
| Q8WWQ0    | PH-interacting protein                                                  | PHIP        | 2.08        | 4.96E-04 |

| Accession | Description                                          | Gene Symbol | Fold change | P-value  |
|-----------|------------------------------------------------------|-------------|-------------|----------|
| Q9BQ61    | Telomerase RNA component interacting RNase           | TRIR        | 2.08        | 3.70E-03 |
| P21283    | V-type proton ATPase subunit C 1                     | ATP6V1C1    | 2.08        | 2.21E-05 |
| Q15654    | Thyroid receptor-interacting protein 6               | TRIP6       | 2.08        | 1.28E-04 |
| P78344    | Eukaryotic translation initiation factor 4 gamma 2   | EIF4G2      | 2.08        | 1.28E-03 |
| Q8WTV0-2  | Isoform 1 of Scavenger receptor class B member 1     | SCARB1      | 2.07        | 2.90E-07 |
| Q14203-4  | Isoform 4 of Dynactin subunit 1                      | DCTN1       | 2.07        | 6.94E-04 |
| P24534    | Elongation factor 1-beta                             | EEF1B2      | 2.07        | 7.33E-06 |
| P42285    | Exosome RNA helicase MTR4                            | MTREX       | 2.07        | 3.23E-05 |
| P43490    | Nicotinamide phosphoribosyltransferase               | NAMPT       | 2.06        | 4.01E-03 |
| P11586    | C-1-tetrahydrofolate synthase, cytoplasmic           | MTHFD1      | 2.06        | 5.29E-07 |
| Q86TG7    | Retrotransposon-derived protein PEG10                | PEG10       | 2.06        | 8.84E-07 |
| P60228    | Eukaryotic translation initiation factor 3 subunit E | EIF3E       | 2.06        | 2.96E-04 |
| A0MZ66    | Shootin-1                                            | SHTN1       | 2.05        | 2.24E-04 |
| Q14684    | Ribosomal RNA processing protein 1 homolog B         | RRP1B       | 2.05        | 3.07E-02 |
| Q9UNX4    | WD repeat-containing protein 3                       | WDR3        | 2.05        | 1.61E-04 |
| Q9Y3Y2    | Chromatin target of PRMT1 protein                    | CHTOP       | 2.04        | 1.20E-04 |
| Q9Y315    | Deoxyribose-phosphate aldolase                       | DERA        | 2.04        | 1.63E-05 |
| Q15075    | Early endosome antigen 1                             | EEA1        | 2.03        | 8.06E-06 |
| O00401    | Neural Wiskott-Aldrich syndrome protein              | WASL        | 2.03        | 7.13E-03 |
| O00159    | Unconventional myosin-Ic                             | MYO1C       | 2.03        | 3.85E-04 |
| Q9Y6A5    | Transforming acidic coiled-coil-containing protein 3 | TACC3       | 2.03        | 2.79E-04 |
| Q14847    | LIM and SH3 domain protein 1                         | LASP1       | 2.03        | 7.75E-03 |

| Accession | Description                                              | Gene Symbol | Fold change | P-value  |
|-----------|----------------------------------------------------------|-------------|-------------|----------|
| P17844    | Probable ATP-dependent RNA helicase DDX5                 | DDX5        | 2.03        | 3.42E-05 |
| P09601    | Heme oxygenase 1                                         | HMOX1       | 2.03        | 5.83E-07 |
| Q9BUJ2    | Heterogeneous nuclear ribonucleoprotein U-like protein 1 | HNRNPUL1    | 2.03        | 2.92E-04 |
| Q9NVP1    | ATP-dependent RNA helicase DDX18                         | DDX18       | 2.02        | 9.24E-03 |
| Q9NP97    | Dynein light chain roadblock-type 1                      | DYNLRB1     | 2.01        | 2.76E-02 |
| P57678    | Gem-associated protein 4                                 | GEMIN4      | 2.01        | 5.50E-06 |
| O75116    | Rho-associated protein kinase 2                          | ROCK2       | 2.01        | 1.88E-05 |
| O75150    | E3 ubiquitin-protein ligase BRE1B                        | RNF40       | 2.00        | 1.67E-03 |
| P50579    | Methionine aminopeptidase 2                              | METAP2      | 2.00        | 2.54E-02 |
| P11388    | DNA topoisomerase 2-alpha                                | TOP2A       | 2.00        | 4.87E-04 |

(d) Down-regulated proteins comparison KO2 versus WT

| Accession | Description                                                | Gene Symbol | Fold change | P-value  |
|-----------|------------------------------------------------------------|-------------|-------------|----------|
| P07919    | Cytochrome b-c1 complex subunit 6, mitochondrial           | UQCRH       | 0.180       | 2.44E-06 |
| P21953    | 2-oxoisovalerate dehydrogenase subunit beta, mitochondrial | BCKDHB      | 0.221       | 2.32E-03 |
| Q9UQ90    | Paraplegin                                                 | SPG7        | 0.230       | 3.91E-02 |
| Q5VWZ2    | Lysophospholipase-like protein 1                           | LYPLAL1     | 0.235       | 3.18E-05 |
| Q92506    | (3R)-3-hydroxyacyl-CoA dehydrogenase                       | HSD17B8     | 0.239       | 4.44E-08 |
| Q9BYC8    | 39S ribosomal protein L32, mitochondrial                   | MRPL32      | 0.244       | 9.69E-03 |
| P50336    | Protoporphyrinogen oxidase                                 | PPOX        | 0.259       | 1.31E-06 |
| Q15526    | Surfeit locus protein 1                                    | SURF1       | 0.272       | 3.54E-03 |
| Q9UII2    | ATPase inhibitor, mitochondrial                            | ATP5IF1     | 0.283       | 1.37E-05 |

| Accession | Description                                                          | Gene Symbol | Fold change | P-value  |
|-----------|----------------------------------------------------------------------|-------------|-------------|----------|
| Q8NBL1    | Protein O-glucosyltransferase 1                                      | POGLUT1     | 0.290       | 3.60E-02 |
| Q9H857-2  | Isoform 2 of 5'-nucleotidase domain-containing protein 2             | NT5DC2      | 0.291       | 3.79E-07 |
| Q12805    | EGF-containing fibulin-like extracellular matrix protein 1           | EFEMP1      | 0.306       | 6.86E-05 |
| Q9NQH7    | Xaa-Pro aminopeptidase 3                                             | XPNPEP3     | 0.309       | 3.16E-08 |
| P98160    | Basement membrane-specific heparan sulfate proteoglycan core protein | HSPG2       | 0.312       | 1.27E-05 |
| P12694    | 2-oxoisovalerate dehydrogenase subunit alpha, mitochondrial          | BCKDHA      | 0.334       | 1.15E-06 |
| P08697    | Alpha-2-antiplasmin                                                  | SERPINF2    | 0.338       | 1.03E-02 |
| Q9NRK6    | ATP-binding cassette sub-family B member 10, mitochondrial           | ABCB10      | 0.343       | 1.68E-03 |
| O00461    | Golgi integral membrane protein 4                                    | GOLIM4      | 0.346       | 1.30E-05 |
| Q99523    | Sortilin                                                             | SORT1       | 0.360       | 1.44E-04 |
| Q86SX6    | Glutaredoxin-related protein 5, mitochondrial                        | GLRX5       | 0.362       | 5.75E-05 |
| Q14699    | Raftlin                                                              | RFTN1       | 0.371       | 2.98E-03 |
| Q8WWV3    | Reticulon-4-interacting protein 1, mitochondrial                     | RTN4IP1     | 0.372       | 3.95E-03 |
| Q99538    | Legumain                                                             | LGMN        | 0.374       | 3.36E-08 |
| Q9Y2U8    | Inner nuclear membrane protein Man1                                  | LEMD3       | 0.381       | 1.10E-02 |
| Q9H4B0    | tRNA N6-adenosine threonylcarbamoyltransferase, mitochondrial        | OSGEPL1     | 0.388       | 1.27E-05 |
| P18859    | ATP synthase-coupling factor 6, mitochondrial                        | ATP5PF      | 0.394       | 2.02E-03 |
| Q8NCN5    | Pyruvate dehydrogenase phosphatase regulatory subunit, mitochondrial | PDPR        | 0.397       | 5.96E-05 |
| Q8N9F7    | Lysophospholipase D GDPD1                                            | GDPD1       | 0.397       | 7.58E-03 |
| P43155    | Carnitine O-acetyltransferase                                        | CRAT        | 0.397       | 2.88E-07 |
| Q96D42    | Hepatitis A virus cellular receptor 1                                | HAVCR1      | 0.398       | 3.12E-05 |
| P23434    | Glycine cleavage system H protein, mitochondrial                     | GCSH        | 0.401       | 4.07E-04 |



| Accession | Description                                          | Gene Symbol | Fold change | P-value  |
|-----------|------------------------------------------------------|-------------|-------------|----------|
| P80303    | Nucleobindin-2                                       | NUCB2       | 0.401       | 1.10E-05 |
| Q96I59    | Probable asparagine--tRNA ligase, mitochondrial      | NARS2       | 0.404       | 1.50E-03 |
| Q8NFF5    | FAD synthase                                         | FLAD1       | 0.406       | 5.46E-03 |
| P56589    | Peroxisomal biogenesis factor 3                      | PEX3        | 0.407       | 1.04E-04 |
| Q8WVM0    | Dimethyladenosine transferase 1, mitochondrial       | TFB1M       | 0.409       | 2.07E-03 |
| P17301    | Integrin alpha-2                                     | ITGA2       | 0.410       | 2.05E-02 |
| P04062    | Lysosomal acid glucosylceramidase                    | GBA         | 0.412       | 1.41E-07 |
| O95994    | Anterior gradient protein 2 homolog                  | AGR2        | 0.413       | 1.05E-04 |
| Q16762    | Thiosulfate sulfurtransferase                        | TST         | 0.417       | 1.87E-07 |
| P02787    | Serotransferrin                                      | TF          | 0.419       | 1.32E-07 |
| O00754    | Lysosomal alpha-mannosidase                          | MAN2B1      | 0.419       | 2.92E-05 |
| Q06203    | Amidophosphoribosyltransferase                       | PPAT        | 0.420       | 1.20E-03 |
| Q9H2K0    | Translation initiation factor IF-3, mitochondrial    | MTIF3       | 0.422       | 5.09E-05 |
| P09497    | Clathrin light chain B                               | CLTB        | 0.428       | 6.12E-05 |
| Q9Y276    | Mitochondrial chaperone BCS1                         | BCS1L       | 0.435       | 5.46E-05 |
| P07306    | Asialoglycoprotein receptor 1                        | ASGR1       | 0.438       | 1.11E-05 |
| P28300    | Protein-lysine 6-oxidase                             | LOX         | 0.440       | 3.78E-05 |
| P13284    | Gamma-interferon-inducible lysosomal thiol reductase | IFI30       | 0.443       | 1.03E-02 |
| Q92968    | Peroxisomal membrane protein PEX13                   | PEX13       | 0.449       | 4.58E-03 |
| P14209    | CD99 antigen                                         | CD99        | 0.450       | 1.08E-03 |
| Q13740    | CD166 antigen                                        | ALCAM       | 0.451       | 1.05E-06 |
| Q8NBJ4    | Golgi membrane protein 1                             | GOLM1       | 0.458       | 1.46E-06 |

| Accession | Description                                                             | Gene Symbol | Fold change | P-value  |
|-----------|-------------------------------------------------------------------------|-------------|-------------|----------|
| P50416    | Carnitine O-palmitoyltransferase 1, liver isoform                       | CPT1A       | 0.459       | 1.04E-07 |
| P22830    | Ferrochelatase, mitochondrial                                           | FECH        | 0.459       | 7.40E-06 |
| P05166    | Propionyl-CoA carboxylase beta chain, mitochondrial                     | PCCB        | 0.465       | 1.46E-05 |
| Q96AX2    | Ras-related protein Rab-37                                              | RAB37       | 0.467       | 5.18E-05 |
| Q8IVS2    | Malonyl-CoA-acyl carrier protein transacylase, mitochondrial            | MCAT        | 0.469       | 1.18E-02 |
| Q15149-4  | Isoform 4 of Plectin                                                    | PLEC        | 0.471       | 4.03E-05 |
| P04626    | Receptor tyrosine-protein kinase erbB-2                                 | ERBB2       | 0.471       | 1.05E-04 |
| Q8NF37    | Lysophosphatidylcholine acyltransferase 1                               | LPCAT1      | 0.473       | 1.92E-04 |
| P33897    | ATP-binding cassette sub-family D member 1                              | ABCD1       | 0.480       | 1.60E-05 |
| Q7L592    | Protein arginine methyltransferase NDUF7, mitochondrial                 | NDUF7       | 0.480       | 1.03E-03 |
| Q8N4Q1    | Mitochondrial intermembrane space import and assembly protein 40        | CHCHD4      | 0.484       | 1.08E-05 |
| Q9NP58    | ATP-binding cassette sub-family B member 6                              | ABCB6       | 0.488       | 4.31E-03 |
| P53634    | Dipeptidyl peptidase 1                                                  | CTSC        | 0.488       | 3.45E-06 |
| Q16134    | Electron transfer flavoprotein-ubiquinone oxidoreductase, mitochondrial | ETFDH       | 0.488       | 1.62E-03 |
| Q9UH99    | SUN domain-containing protein 2                                         | SUN2        | 0.490       | 2.41E-03 |
| Q9UBR2    | Cathepsin Z                                                             | CTSZ        | 0.492       | 2.12E-06 |
| O15091    | Mitochondrial ribonuclease P catalytic subunit                          | PRORP       | 0.492       | 2.43E-04 |
| O00469    | Procollagen-lysine,2-oxoglutarate 5-dioxygenase 2                       | PLOD2       | 0.493       | 2.94E-07 |
| P36551    | Oxygen-dependent coproporphyrinogen-III oxidase, mitochondrial          | CPOX        | 0.493       | 1.29E-06 |
| P02751-1  | Isoform 1 of Fibronectin                                                | FN1         | 0.495       | 1.89E-04 |
| Q9Y5J9    | Mitochondrial import inner membrane translocase subunit Tim8 B          | TIMM8B      | 0.500       | 7.92E-03 |
| Q9BRA2    | Thioredoxin domain-containing protein 17                                | TXNDC17     | 0.500       | 2.96E-02 |

WT, hep G2 cells; KO1, site A and C mutant NPC1 model cells; KO1, site B and D mutant NPC1 model cells.
