# Supplementary material for: Global Proteomics for Identifying the Alteration Pathway of Niemann–Pick Disease Type C Using Hepatic Cell Models
Source: MDPI journal article supplement (doi:10.3390/ijms242115642), 2023-10-27
Supplement: s1 [file s1]

Table S1 Identified protein numbers in global label free proteomics.

| Region | Group              | Exclusive<br>(number) | Total<br>(number) |
|--------|--------------------|-----------------------|-------------------|
| A      | WT                 | 37                    | 3530              |
| B      | KO1                | 24                    | 3468              |
| C      | KO2                | 82                    | 3570              |
| D      | WT and KO1         | 59                    | 3608              |
| E      | KO1 and KO2        | 54                    | 3653              |
| F      | WT and KO2         | 103                   | 3666              |
| G      | WT and KO1 and KO2 | 3331                  | 3331              |
| H      | Sum                | 3690                  |                   |

WT, hep G2 cells; KO1, site A and C mutant NPC1 model cells; KO1, site B and D mutant NPC1 model cells.
